# Supplementary material
Source: MDPI journal article supplement (https://www.mdpi.com/1999-4907/10/9/823)
Supplement: s1 [file s1]

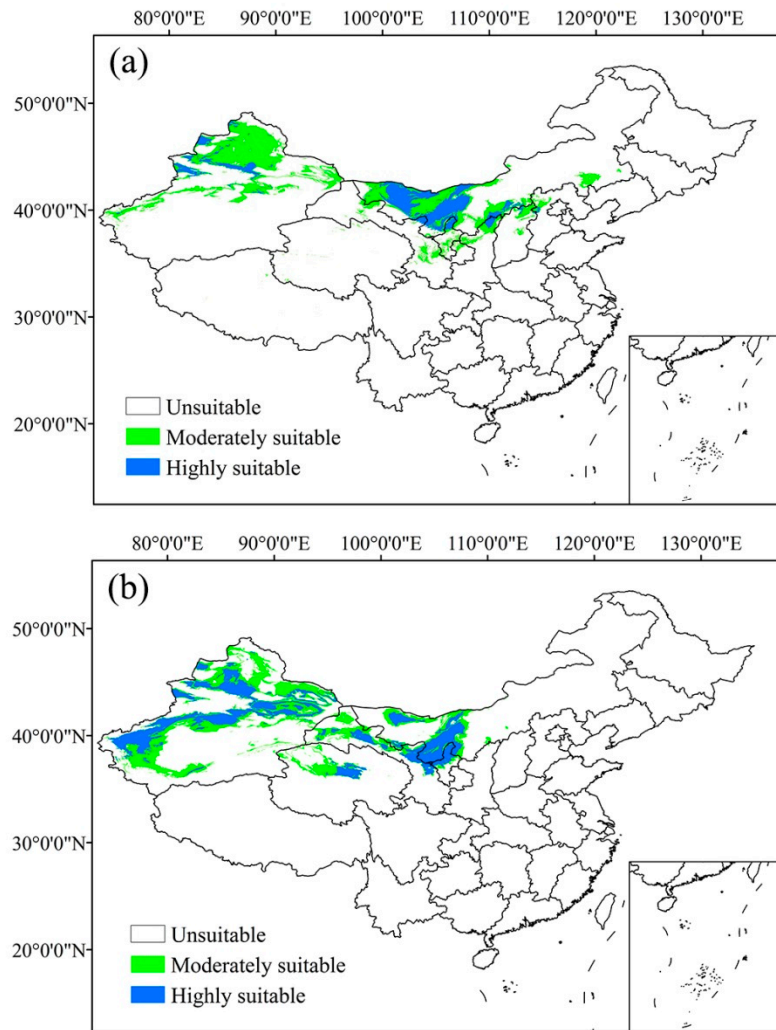

Figure S1: Potential comprehensive habitat suitability of *C. deserticola* (a) and *H. ammodendron* (b) in current.
